# Supplementary material
Source: PubMed Central journal article supplement (PMC6791447)
Supplement: koni-08-11-1659092-s001.pdf [file koni-08-11-1659092-s001.pdf]

**Supplementary Table 1** Correlation of PD-L1 expression with clinicopathological parameters in ovarian cancer

| characteristics                 | case (n) | PD-L1 expression(Mean $\pm$ SD) | p-value                  |
|---------------------------------|----------|---------------------------------|--------------------------|
| Normal                          | 14       | 0.18 $\pm$ 0.08                 | <b>&lt;0.0001*</b>       |
| cancer                          | 175      | 0.439 $\pm$ 0.22                |                          |
| Stage(FIGO)                     |          |                                 |                          |
| I                               | 98       | 0.39 $\pm$ 0.23                 | 0.793                    |
| II-IV                           | 77       | 0.38 $\pm$ 0.20                 |                          |
| Histological grade <sup>f</sup> |          |                                 |                          |
| Low(1-2)                        | 52       | 0.39 $\pm$ 0.25                 | 0.139                    |
| High(3)                         | 53       | 0.46 $\pm$ 0.24                 |                          |
| Histology                       |          |                                 |                          |
| Serous                          | 111      | 0.37 $\pm$ 0.20                 | <b>0.001<sup>+</sup></b> |
| Mucinous                        | 26       | 0.31 $\pm$ 0.22                 |                          |
| Endometrioid                    | 31       | 0.53 $\pm$ 0.25                 |                          |
| Clear Cell                      | 7        | 0.35 $\pm$ 0.11                 |                          |
| Endometrioid                    | 31       | 0.53 $\pm$ 0.25                 |                          |
| Serous/Mucinous/Clear cell      | 144      | 0.35 $\pm$ 0.20                 | <b>&lt;0.0001*</b>       |

\*Mann-Whitney test, <sup>+</sup>Kruskal-Wallis rank test

Intensity values are calculated by ImageScope as specified in Methods

<sup>f</sup> 70 cases with unclear grade classification
